# Supplementary material
Source: Springer Nature journal article supplement (https://www.springermedizin.de/resource/supplementary/13099_2012_62_MOESM7_ESM.pdf/9665508)
Supplement: MOESM7 [file 9665508]

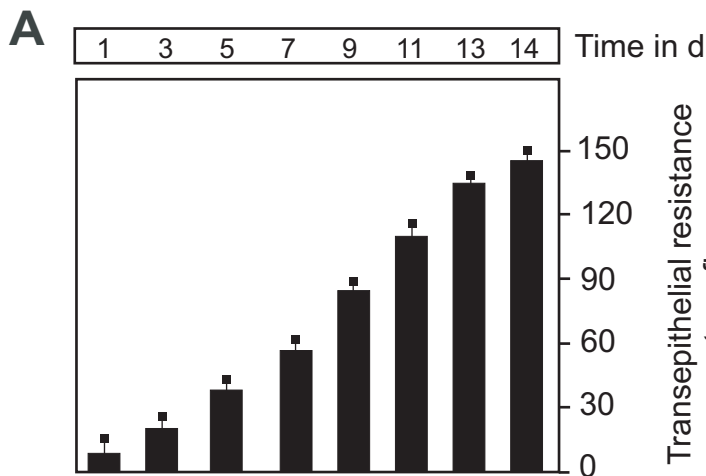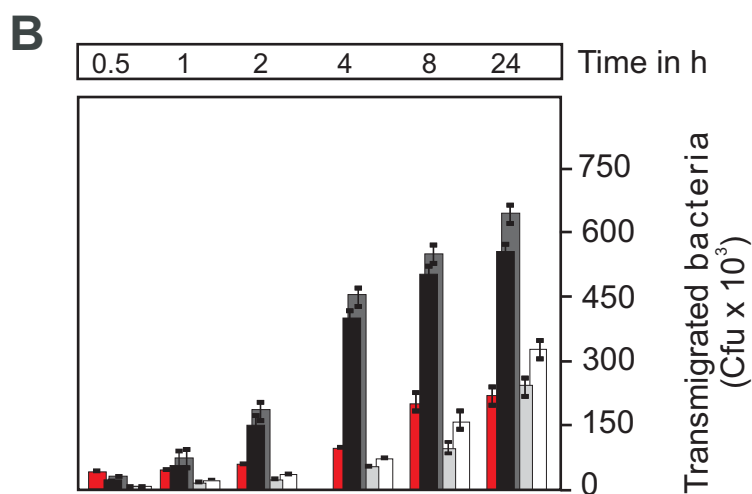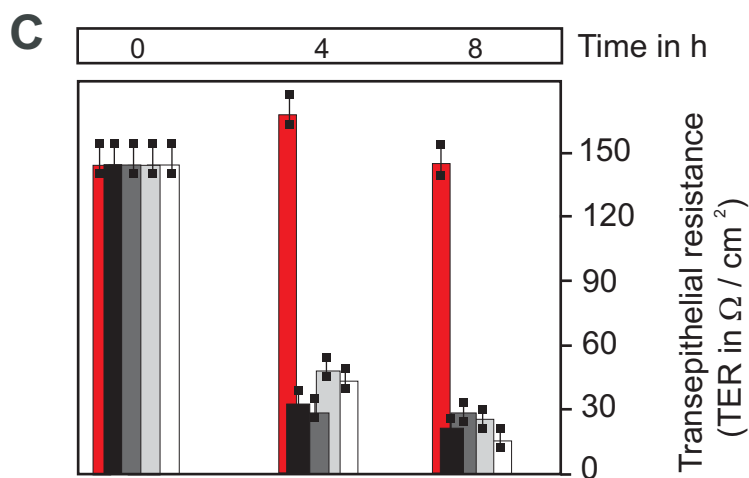

- *C. jejuni* 81-176 wt
- *Shigella flexneri*
- *Salmonella typhimurium*
- *Neisseria gonorrhoeae*
- *Listeria monocytogenes*
